# Supplementary material
Source: PubMed Central journal article supplement (PMC6325007)
Supplement: NIHMS1512065-supplement-1.pdf [file NIHMS1512065-supplement-1.pdf]

**Sup. Video 1. Three-dimensional rendering of CX3CR1<sup>+</sup> CCR2<sup>+</sup> peripheral cell infiltration in flat mount optic nerve after crush injury.**

Flat mount optic nerve of CX3CR1<sup>+EGFP</sup>::CCR2<sup>+RFP</sup> bone marrow chimera. Spatial distribution of peripheral CX3CR1<sup>+</sup> and CCR2<sup>+</sup> monocytes in the optic nerve after crush injury. Significant increase in peripheral CCR2<sup>+</sup> CX3CR1<sup>-negative</sup> cells at the site of the injury, and CCR2<sup>-negative</sup> CX3CR1<sup>+</sup> cells at the adjacent uninjured tissue. Three independent experiments with 1 mouse per group per experiment.
